# Supplementary material
Source: HighWire-hosted journal article supplement (https://ajnr.org/content/suppl/2013/02/22/ajnr.A3454)
Supplement: 3454_table.pdf [file 3454_table.pdf]

**On-Line Table: Differential diagnosis of rapidly progressive dementias**

| Rapidly Progressive Dementias                                                                                                                                                                                                                                 | MR Imaging Characteristics                                                                                                                                                                                                                                                                                                                                                                                                                                                                                                                                                                                                                                                                                                                                                                                                                                                                                                                                                                                                           |
|---------------------------------------------------------------------------------------------------------------------------------------------------------------------------------------------------------------------------------------------------------------|--------------------------------------------------------------------------------------------------------------------------------------------------------------------------------------------------------------------------------------------------------------------------------------------------------------------------------------------------------------------------------------------------------------------------------------------------------------------------------------------------------------------------------------------------------------------------------------------------------------------------------------------------------------------------------------------------------------------------------------------------------------------------------------------------------------------------------------------------------------------------------------------------------------------------------------------------------------------------------------------------------------------------------------|
| Neurodegenerative conditions<br>Variants of typically slowly progressive dementia<br>Alzheimer disease<br><br>Frontotemporal dementia                                                                                                                         | Diffuse atrophy, particularly within hippocampus, medial temporal lobes (with enlargement of temporal horns);<br>MRS shows decreased NAA, increased myo-inositol<br>Generalized atrophy of frontal and temporal lobes may be detected with MRI; “knife edge” sign with focal atrophy of temporal lobe                                                                                                                                                                                                                                                                                                                                                                                                                                                                                                                                                                                                                                                                                                                                |
| Progressive neurodegenerative dementias<br>Dementia with Lewy bodies<br><br>Corticobasal degeneration<br><br>Progressive supranuclear palsy<br><br>Parkinson disease with dementia<br><br>Huntington disease<br><br>Multiple-system atrophy                   | Nonspecific global and subcortical atrophy, relative preservation of medial temporal lobe<br>Atrophy within caudate nucleus, putamen, frontal and superior parietal cortices; T2-weighted signal increase in subcortical WM<br>Severe atrophy of midbrain, pons with “hummingbird” or “penguin” sign on sagittal images; Low T2 signal within putamen with increased ADC; T2 hyperintensity of tegmentum, loss of sagittal convexity of midbrain profile<br>Thinning of pars compacta occasionally (T2 hyperintense band of substantia nigra); decreased FA and magnetization transfer ratio in substantia nigra<br>Atrophy of caudate nucleus (with enlargement of frontal horns), sometimes T2 hyperintense; T2/FLAIR hypointensity within basal ganglia with iron deposition<br>Severe atrophy within brain stem, cerebellum, putamen with putaminal hypointensity on T2 with hyperintense rim and increased ADC; pons T2/FLAIR hyperintensity, “hot cross bun” sign with decreased FA within pons and middle cerebellar peduncle |
| Prion-related conditions<br>Creutzfeldt-Jakob disease                                                                                                                                                                                                         | DWI hyperintensity within basal ganglia, thalamus, and cortex with “cortical ribboning” (usually occipital); “hockey stick” sign; DWI hyperintensity within dorsomedial thalamus and pulvinar                                                                                                                                                                                                                                                                                                                                                                                                                                                                                                                                                                                                                                                                                                                                                                                                                                        |
| Infectious-disease related conditions<br>Viral encephalitis<br><br>HIV-related dementia<br><br>Tertiary syphilis<br><br>Neuroborreliosis (Lyme disease)<br>Subacute sclerosing panencephalitis (pediatric age group)<br><br>Variant Creutzfeldt-Jakob disease | FLAIR and T2 hyperintensity within temporal (particularly, medial), insular, and inferior frontal cortices in herpes; thalami and subcortical GM in Japanese encephalitis; DWI hyperintensity/ADC reduction in same distribution acutely; restricted diffusion in insular cortex bilaterally is pathognomonic<br>Periventricular T2/FLAIR hyperintensity without contrast enhancement; diffuse atrophy; MRS reductions in glutamate/glutamine and NAA<br>Meningovascular contrast-enhancement; T2 and FLAIR hyperintensities in arterial distribution<br>Nonspecific T2 hyperintense foci, cranial nerve enhancement<br>Periventricular T2 hyperintensities; hyperintense lesions in parietal/temporal lobes; decreased FA within white matter on DTI; MRS shows decreased NAA, increased choline, lipid, and lactate<br>As described under prion-related conditions                                                                                                                                                                 |
| Inflammatory/autoimmune conditions<br>Vasculitis<br><br>Hashimoto encephalopathy/steroid-responsive encephalopathy with autoimmune thyroiditis<br>Multiple sclerosis<br><br>Lupus cerebritis<br>Neurosarcoidosis                                              | Nonspecific T2-weighted and FLAIR hyperintensities; vessel wall thickening seen on MRI and MRA<br>Nonspecific subcortical white matter abnormalities on FLAIR; contrast-enhancement of meninges<br>Diffuse atrophy; reduction in NAA in normal-appearing gray and white matter on MRS<br>Deep white matter loss, scattered white matter lesions<br>Contrast-enhancing dural plaques; periventricular T2 hyperintensities; multiple brain lesions; leptomeningeal enhancement<br>Hyperintense T2 foci in posterior white matter, nonspecific                                                                                                                                                                                                                                                                                                                                                                                                                                                                                          |
| Neoplasm-related conditions<br>Paraneoplastic autoimmune encephalitis<br>Lymphoma, primary CNS                                                                                                                                                                | Mesial temporal lobe hyperintensity on FLAIR<br>T1 isointense to slightly hyperintense, T2 slightly hypointense mass; homogeneous enhancement; classic “butterfly” lesion crossing corpus callosum; MRS shows increased choline, lipid, and lactate; MR perfusion shows rCBV lower than that in GBM or metastases; multiple lesions more common in AIDS, solitary more common in the immunocompetent                                                                                                                                                                                                                                                                                                                                                                                                                                                                                                                                                                                                                                 |

**On-Line Table: (Continued)**

| Rapidly Progressive Dementias                                          | MR Imaging Characteristics                                                                                                                                    |
|------------------------------------------------------------------------|---------------------------------------------------------------------------------------------------------------------------------------------------------------|
| Metastatic malignancy                                                  | Multiple small lesions at GM-WM junction, frequently edematous with T2 hyperintensity; T1 hyperintensity if hemorrhage; peripheral contrast enhancement       |
| Lymphomatoid granulomatosis                                            | DTI demonstrates displacement, not invasion, of white matter tracts; increased rCBV and rCBF                                                                  |
| Toxic/metabolic/endocrine conditions                                   | Multifocal punctate and linear enhancing lesions; temporal lobe atrophy in some cases                                                                         |
| Metals (eg, manganese)                                                 | T1 hyperintensity within basal ganglia, particularly globus pallidus                                                                                          |
| Vitamin B <sub>1</sub> (thiamine) deficiency (Wernicke encephalopathy) | T2-weighted and FLAIR hyperintensities within periaqueductal regions, around third ventricle and bilateral thalami; contrast enhancement of mammillary bodies |
| Mitochondriopathy, MELAS                                               | Cortical T2-based hyperintensities, corresponding DWI hyperintensity in gyriform pattern                                                                      |
| Wilson disease                                                         | Diffuse atrophy with signal irregularities in deep gray and white matter, "panda sign"                                                                        |
| Osmotic myelinolysis                                                   | Diffuse hyperintensity within basis pontis on T2/FLAIR, with restricted diffusion, with "trident" sign                                                        |

**Note:**—MELAS indicates mitochondrial myopathy; FA, fractional anisotropy; GBM, glioblastoma multiforme; GM, gray matter; rCBF, relative cerebral blood flow; rCBV, relative cerebral blood volume.
